# Supplementary material for: Influence of Cooking and Ingredients on the Antioxidant Activity, Phenolic Content and Volatile Profile of Different Variants of the Mediterranean Typical Tomato Sofrito
Source: PubMed Central journal article supplement (PMC6912581; doi:10.3390/antiox8110551), 2019-11-14
Supplement: antioxidants-08-00551-s001.pdf [file antioxidants-08-00551-s001.pdf]

**Supplementary Materials: Table S1.** Box–Behnken experimental design showing the levels of each independent variable (sample weight, extraction temperature, extraction time and NaCl concentration) for the HS-SPME extraction of target compounds in *sofrito* number 1.

| Run | Sample weight (g) | Temperature (°C) | Time (min) | NaCl (M) |
|-----|-------------------|------------------|------------|----------|
| 1   | 1.75              | 47.5             | 35         | 1        |
| 2   | 3                 | 47.5             | 60         | 1        |
| 3   | 1.75              | 35               | 35         | 2        |
| 4   | 3                 | 35               | 35         | 1        |
| 5   | 1.75              | 60               | 60         | 1        |
| 6   | 1.75              | 47.5             | 60         | 2        |
| 7   | 3                 | 60               | 35         | 1        |
| 8   | 0.5               | 35               | 35         | 1        |
| 9   | 1.75              | 60               | 35         | 0        |
| 10  | 1.75              | 47.5             | 60         | 0        |
| 11  | 1.75              | 47.5             | 10         | 0        |
| 12  | 0.5               | 47.5             | 35         | 0        |
| 13  | 1.75              | 47.5             | 35         | 1        |
| 14  | 1.75              | 47.5             | 35         | 1        |
| 15  | 3                 | 47.5             | 35         | 0        |
| 16  | 3                 | 47.5             | 35         | 2        |
| 17  | 1.75              | 47.5             | 10         | 2        |
| 18  | 1.75              | 60               | 10         | 1        |
| 19  | 1.75              | 35               | 60         | 1        |
| 20  | 1.75              | 60               | 35         | 2        |
| 21  | 0.5               | 47.5             | 60         | 1        |
| 22  | 1.75              | 47.5             | 35         | 1        |
| 23  | 1.75              | 47.5             | 35         | 1        |
| 24  | 0.5               | 60               | 35         | 1        |
| 25  | 0.5               | 47.5             | 35         | 2        |
| 26  | 1.75              | 35               | 10         | 1        |
| 27  | 1.75              | 35               | 35         | 0        |
| 28  | 3                 | 47.5             | 10         | 1        |
| 29  | 0.5               | 47.5             | 10         | 1        |

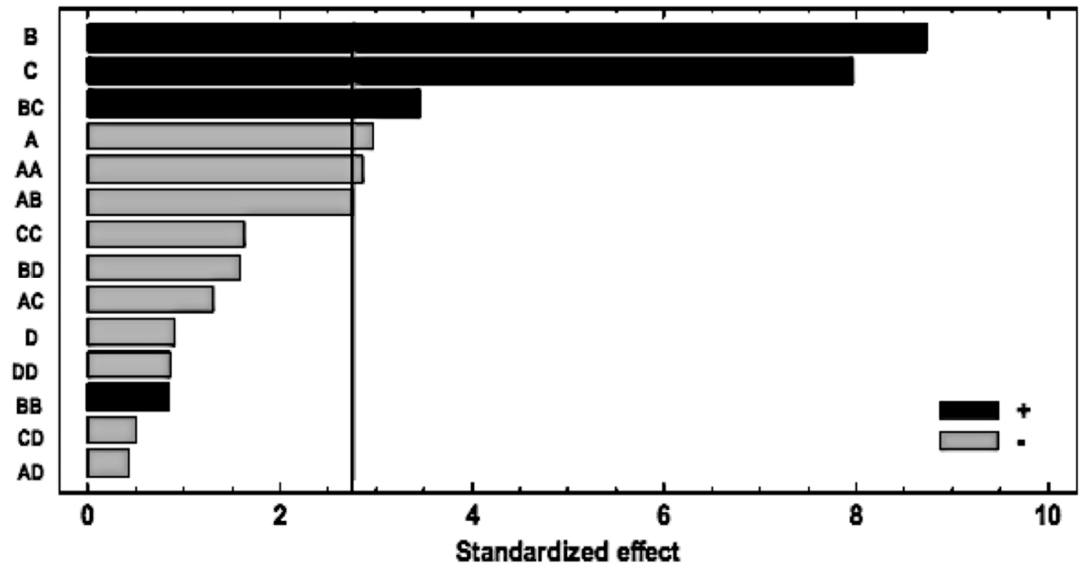

Supplementary Figure S1. Pareto chart of factors and interactions obtained from the BBD for the response.
